# Supplementary material for: Spin-Cherenkov effect in a magnetic nanostrip with interfacial Dzyaloshinskii-Moriya interaction
Source: PubMed Central journal article supplement (PMC4855169; doi:10.1038/srep25189), 2016-05-04
Supplement: srep25189-s1.pdf [file srep25189-s1.pdf]

# Supplementary Information for “Spin-Cherenkov effect in a magnetic nanostrip with interfacial Dzyaloshinskii-Moriya interaction”

Jing Xia,<sup>1,2</sup> Xichao Zhang,<sup>1,2</sup> Ming Yan,<sup>3</sup> Weisheng Zhao,<sup>4,5,\*</sup> and Yan Zhou<sup>1,2,6,†</sup>

<sup>1</sup>*School of Electronics Science and Engineering,  
Nanjing University, Nanjing 210093, China*

<sup>2</sup>*Department of Physics, University of Hong Kong, Hong Kong, China*

<sup>3</sup>*Department of Physics, Shanghai University, Shanghai 200444, China*

<sup>4</sup>*Fert Beijing Institute, Beihang University, Beijing 100191, China*

<sup>5</sup>*School of Electronic and Information Engineering,  
Beihang University, Beijing 100191, China*

<sup>6</sup>*Center of Theoretical and Computational Physics,  
University of Hong Kong, Hong Kong, China*

(Dated: February 29, 2016)

---

\* E-mail: [weisheng.zhao@buaa.edu.cn](mailto:weisheng.zhao@buaa.edu.cn)

† E-mail: [yanzhou@hku.hk](mailto:yanzhou@hku.hk)

## Supplementary Figures

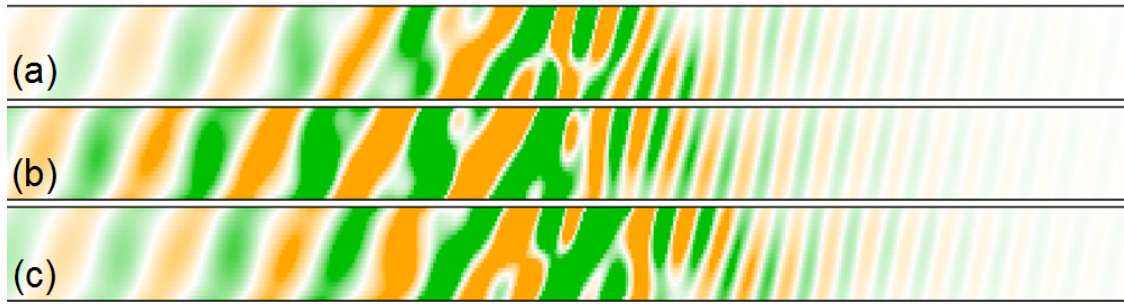

Supplementary Figure 1. Snapshots of the  $z$ -component of the magnetization in magnetic strips in the vicinity of the field pulse traveling at a constant speed with different moving field profiles. The external rectangular shape field pulse ( $\mathbf{H}$ ) is applied to the  $12\text{-}\mu\text{m}$ -long,  $100\text{-nm}$ -wide, and  $10\text{-nm}$ -thick magnetic strip with a magnitude of  $10\text{ mT}$  in the  $z$ -direction and constant speed of  $v_h$ . Here,  $D = 1\text{ mJ m}^{-2}$  and  $v_h = 1100\text{ m s}^{-1}$ . **(a)** The width in the  $x$ -direction and length in the  $y$ -direction of the moving magnetic field equal  $12\text{ nm}$  and  $100\text{ nm}$ , respectively. **(b)** The width in the  $x$ -direction and length in the  $y$ -direction of the moving magnetic field equal  $50\text{ nm}$  and  $100\text{ nm}$ , respectively. **(c)** The width in the  $x$ -direction and length in the  $y$ -direction of the moving magnetic field equal  $100\text{ nm}$  and  $100\text{ nm}$ , respectively. The color scale representing the out-of-plane component of the magnetization  $m_z$  is shown in the Figure 1 of the main text.

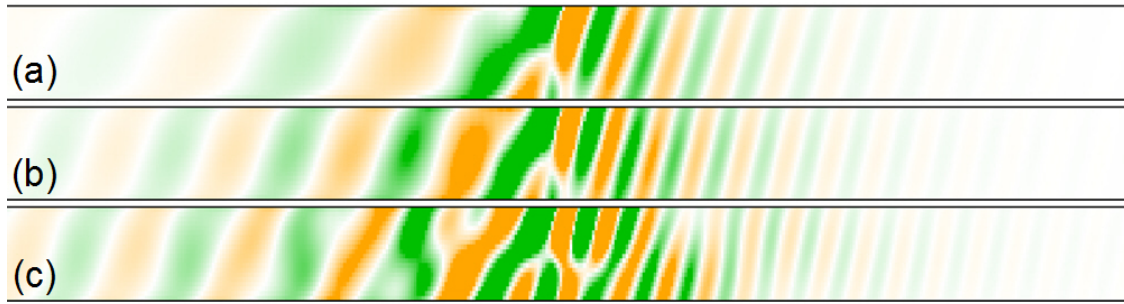

Supplementary Figure 2. Snapshots of the  $z$ -component of the magnetization in magnetic strips with different thicknesses in the vicinity of the field pulse traveling at a constant speed. The external rectangular shape field pulse ( $\mathbf{H}$ ), 12 nm wide in the  $x$ -direction and 100 nm long in the  $y$ -direction, is applied to the 12- $\mu\text{m}$ -long, and 100-nm-wide magnetic strip with a magnitude of 10 mT in the  $z$ -direction and constant speed of  $v_h$ . Here,  $D = 1 \text{ mJ m}^{-2}$  and  $v_h = 1100 \text{ m s}^{-1}$ . **(a)** The thickness of the magnetic strip equals 1 nm. **(b)** The thickness of the magnetic strip equals 5 nm. **(c)** The thickness of the magnetic strip equals 10 nm. The color scale representing the out-of-plane component of the magnetization  $m_z$  is shown in the Figure 1 of the main text.
